# Supplementary material for: Genome-wide base editor screen identifies regulators of protein abundance in yeast
Source: eLife. 2022 Nov 3;11:e79525. doi: 10.7554/eLife.79525 (PMC9633064; doi:10.7554/eLife.79525)
Supplement: Supplementary file 2. [file elife-79525-supp2.xlsx]

## Sheet: Sheet1
Name	Mutation	Background	Notes
yOS057, yOS058, yOS059	RAS2 S46L	S288C BY4741 (MATa his3Δ1 leu2Δ0 met15Δ0 ura3Δ0)
yOS061, yOS062, yOS063	RAS2 Q272*	S288C BY4741 (MATa his3Δ1 leu2Δ0 met15Δ0 ura3Δ0)
yOS054, yOS055, yOS056	IRA2 W342*	S288C BY4741 (MATa his3Δ1 leu2Δ0 met15Δ0 ura3Δ0)
yOS079, yOS080, yOS082	SSY5 A637K/R	S288C BY4741 (MATa his3Δ1 leu2Δ0 met15Δ0 ura3Δ0)
yOS064, yOS065, yOS066	POP1 H642Y	S288C BY4741 (MATa his3Δ1 leu2Δ0 met15Δ0 ura3Δ0)
yOS074, yOS075, yOS076	SIT4 Q184*	S288C BY4741 (MATa his3Δ1 leu2Δ0 met15Δ0 ura3Δ0)
GFP strains	GOI-GFP(S65T)-HIS3MX6	S288C BY4741 (MATa his3Δ1 leu2Δ0 met15Δ0 ura3Δ0)	Gene of interest (GOI) is C-terminally tagged with a GFP(S65T) cassette containing also HIS3 from L. kluyveri (Huh et al., 2003)
