# Supplementary material for: Genome-wide base editor screen identifies regulators of protein abundance in yeast
Source: eLife. 2022 Nov 3;11:e79525. doi: 10.7554/eLife.79525 (PMC9633064; doi:10.7554/eLife.79525)
Supplement: Supplementary file 3. [file elife-79525-supp3.xlsx]

## Sheet: Sheet1
Name	Main plasmid component	gRNA targeting sequence	Note
pGal-BE3 (pOS02)	Base editor	NA	Plasmid deposited with Addgene (##172409)
pgRNA-backbone (pOS05a)	gRNA cassette	2-kb placeholder from lentiCRISPR v2 plasmid obtained from Addgene #52961 (Sanjana et al., 2014)	Plasmid deposited with Addgene (#172517)
pLK78	CAN1 T64M gRNA	GATACGTTCTCTATGGAGGA	Plasmid obtained from Addgene #43803 (DiCarlo et al., 2013)
pOS08	CAN1 W174* gRNA	AAACCAATACATGTAACCAT
pOS09	CAN1 W195* gRNA	ACGTCCAAAATTGAATGACT
pOS10	CAN1 W263* gRNA	CTCCAATAACGGAATCCAAC
pOS11	ADE1 W64* gRNA	GAACCAGAACTCTGACAGTT
pOS12	ADE1 Q178* gRNA	TCCTGCCCAGGCCGCTGAGC
pOS13	ADE2 Q122* gRNA	AGTTACCCAAAGTGTTCCTG
pOS14	ADE2 W185* gRNA	GCCCATTTTTCGGCGTACAA
pOS17	GFP Q183* / Q184* gRNA	TATCAACAAAATACTCCAAT
pOS18	GFP E222K gRNA	CAAACTCAAGAAGGACCATG
pOS34	RAS2 S46L gRNA	GGATTCATACAGGAAGCAAG
pOS35	RAS2 Q272* gRNA	CAACGCTCAAAGCGCTAATA
pOS29	IRA2 W342* gRNA	TATCCAAAACATTATTGCTT
pOS40	SSY5 A637T gRNA	TCCCCCGCACTAGCAAATAA
pOS32	POP1 H642Y gRNA	CATCCATAACACTAAATTAC
pOS39	SIT4 Q184* gRNA	GCTCAAGAAGTGCCACACGA
