# Supplementary material for: Genome-wide base editor screen identifies regulators of protein abundance in yeast
Source: eLife. 2022 Nov 3;11:e79525. doi: 10.7554/eLife.79525 (PMC9633064; doi:10.7554/eLife.79525)
Supplement: Supplementary file 4. [file elife-79525-supp4.xlsx]

## Sheet: Sheet1
Name	Description	Sequence	Note
OS123	Barcoding KanR cassette fwd	GTGGTGCTTTTTTTGTTTTTTATGTCTNNNNNNNNNNNNNNNNNNNNCCGGAATTGCCAGCTGGG	20-nucleotide barcode
OS124	Barcoding KanR cassette rev	GCGCGTAATACGACTCACTATAGGCTGTATGCGGTGTGAAATACC
OS088	Backbone for BC-KanR cassette fwd	CCCTATAGTGAGTCGTATTACGCGC
OS089	Backbone for BC-KanR cassette rev	AGACATAAAAAACAAAAAAAGCACCAC
OS113	Sublibrary CanAde fwd	TGGGTGATTCCGCAGGGTCCAGAGT
OS116	Sublibrary CanAde rev	ACTGGTCAATGCGAAGGAAACGCGT
OS111	Sublibrary ES fwd	TGGGTGATTCCGCGTCGAGTAGGGT
OS112	Sublibrary ES rev	ACTGGTCAATGCCGTGTGAAGCTGG
OS152	Sublibrary EP fwd	TGGGTGATTCGGTCGAGCCGGAACT
OS153	Sublibrary EP rev	ACTGGTCAATGGATGCGCACCCAGA
OS150	Sublibrary NS fwd	TGGGTGATTCCGATCGCCCTTGGTG
OS151	Sublibrary NS rev	ACTGGTCAATGGTTTAGCCGGCGTG
OS154	Sublibrary NP fwd	TGGGTGATTCTCCCGGCGTTGTCCT
OS155	Sublibrary NP rev	ACTGGTCAATGCTCCGTCACTGCCC
OS119	Sublibrary 2nd PCR fwd	TGAAAGTTGGTGCGCATGTTTCGGCGTTCGAAACTTCTCCGCAGTGAAAGATAAATGATC
OS120	Sublibrary 2nd PCR rev	ACTTTTTCAAGTTGATAACGGACTAGCCTTATTTTAACTTGCTATTTCTAGCTCTAAAAC
OS125	gRNA-barcode sequencing rev	TCGTCGGCAGCGTCAGATGTGTATAAGAGACAGtaagtagagGCGTTCGAAACTTCTCCGCAG	PAGE-purified
OS130	gRNA-barcode sequencing 1 fwd	TCGTCGGCAGCGTCAGATGTGTATAAGAGACAGtaagtagagGGCTAGCGGTAAAGGTGCGC	Used individually, not as a pool. Note that these primers resulted in unexpected PCR products and were later replaced by OS140-149.
OS131	gRNA-barcode sequencing 2 fwd	TCGTCGGCAGCGTCAGATGTGTATAAGAGACAGatcatgcttaGGCTAGCGGTAAAGGTGCGC
OS132	gRNA-barcode sequencing 3 fwd	TCGTCGGCAGCGTCAGATGTGTATAAGAGACAGgatgcacatctGGCTAGCGGTAAAGGTGCGC
OS133	gRNA-barcode sequencing 4 fwd	TCGTCGGCAGCGTCAGATGTGTATAAGAGACAGcgattgctcgacGGCTAGCGGTAAAGGTGCGC
OS134	gRNA-barcode sequencing 5 fwd	TCGTCGGCAGCGTCAGATGTGTATAAGAGACAGtcgatagcaattcGGCTAGCGGTAAAGGTGCGC
OS135	gRNA-barcode sequencing 6 fwd	TCGTCGGCAGCGTCAGATGTGTATAAGAGACAGatcgatagttgcttGGCTAGCGGTAAAGGTGCGC
OS136	gRNA-barcode sequencing 7 fwd	TCGTCGGCAGCGTCAGATGTGTATAAGAGACAGgatcgatccagttagGGCTAGCGGTAAAGGTGCGC
OS137	gRNA-barcode sequencing 8 fwd	TCGTCGGCAGCGTCAGATGTGTATAAGAGACAGcgatcgatttgagcctGGCTAGCGGTAAAGGTGCGC
OS138	gRNA-barcode sequencing 9 fwd	TCGTCGGCAGCGTCAGATGTGTATAAGAGACAGacgatcgatacacgatcGGCTAGCGGTAAAGGTGCGC
OS139	gRNA-barcode sequencing 10 fwd	TCGTCGGCAGCGTCAGATGTGTATAAGAGACAGtacgatcgatggtccagaGGCTAGCGGTAAAGGTGCGC
OS140	gRNA-barcode sequencing 1 fwd	TCGTCGGCAGCGTCAGATGTGTATAAGAGACAGtaagtagagGCGTTCGAAACTTCTCCGCAG	Used as pool
OS141	gRNA-barcode sequencing 2 fwd	TCGTCGGCAGCGTCAGATGTGTATAAGAGACAGatcatgcttaGCGTTCGAAACTTCTCCGCAG
OS142	gRNA-barcode sequencing 3 fwd	TCGTCGGCAGCGTCAGATGTGTATAAGAGACAGgatgcacatctGCGTTCGAAACTTCTCCGCAG
OS143	gRNA-barcode sequencing 4 fwd	TCGTCGGCAGCGTCAGATGTGTATAAGAGACAGcgattgctcgacGCGTTCGAAACTTCTCCGCAG
OS144	gRNA-barcode sequencing 5 fwd	TCGTCGGCAGCGTCAGATGTGTATAAGAGACAGtcgatagcaattcGCGTTCGAAACTTCTCCGCAG
OS145	gRNA-barcode sequencing 6 fwd	TCGTCGGCAGCGTCAGATGTGTATAAGAGACAGatcgatagttgcttGCGTTCGAAACTTCTCCGCAG
OS146	gRNA-barcode sequencing 7 fwd	TCGTCGGCAGCGTCAGATGTGTATAAGAGACAGgatcgatccagttagGCGTTCGAAACTTCTCCGCAG
OS147	gRNA-barcode sequencing 8 fwd	TCGTCGGCAGCGTCAGATGTGTATAAGAGACAGcgatcgatttgagcctGCGTTCGAAACTTCTCCGCAG
OS148	gRNA-barcode sequencing 9 fwd	TCGTCGGCAGCGTCAGATGTGTATAAGAGACAGacgatcgatacacgatcGCGTTCGAAACTTCTCCGCAG
OS149	gRNA-barcode sequencing 10 fwd	TCGTCGGCAGCGTCAGATGTGTATAAGAGACAGtacgatcgatggtccagaGCGTTCGAAACTTCTCCGCAG
LG_CAN1_1F	Genomic region CAN1 T64M fwd	TCGTCGGCAGCGTCAGATGTGTATAAGAGACAGAGACGCCGACATAGAGGAGA
LG_CAN1_1R	Genomic region CAN1 T64M rev	GTCTCGTGGGCTCGGAGATGTGTATAAGAGACAGACCAAGGGCAATCATACCAA
LG_CAN1_2F	Genomic region CAN1 W174* fwd	TCGTCGGCAGCGTCAGATGTGTATAAGAGACAGTTGGTATGATTGCCCTTGGT
LG_CAN1_2R	Genomic region CAN1 W174* rev	GTCTCGTGGGCTCGGAGATGTGTATAAGAGACAGAAGTTCCAGGGCAAAAGTGA
LG_CAN1_3F	Genomic region CAN1 W195* fwd	TCGTCGGCAGCGTCAGATGTGTATAAGAGACAGTCACTTTTGCCCTGGAACTT
LG_CAN1_3R	Genomic region CAN1 W195* rev	GTCTCGTGGGCTCGGAGATGTGTATAAGAGACAGGCACCTGGGTTTCTCCAATA
LG_CAN1_4F	Genomic region CAN1 W263* fwd	TCGTCGGCAGCGTCAGATGTGTATAAGAGACAGGTTTGTGGTGCTGGGGTTAC
LG_CAN1_4R	Genomic region CAN1 W263* rev	GTCTCGTGGGCTCGGAGATGTGTATAAGAGACAGTCTTGGAACGGATTTTCTGG
OS070	Genomic region ADE1 W64* fwd	TCGTCGGCAGCGTCAGATGTGTATAAGAGACAGTGCTGTTTGTTGCTACGGATCG
OS071	Genomic region ADE1 W64* rev	GTCTCGTGGGCTCGGAGATGTGTATAAGAGACAGAGAGAGCGGTCTTCTAGTTGCG
OS072	Genomic region ADE1 Q178* fwd	TCGTCGGCAGCGTCAGATGTGTATAAGAGACAGTCCCAGAACCAATCTTCACCCC
OS073	Genomic region ADE1 Q178* rev	GTCTCGTGGGCTCGGAGATGTGTATAAGAGACAGTAGAGGAGTCTGGCGTTAGCAC
OS074	Genomic region ADE2 Q122* fwd	TCGTCGGCAGCGTCAGATGTGTATAAGAGACAGCCAATGACCACGTTAATGGCTCC
OS075	Genomic region ADE2 Q122* rev	GTCTCGTGGGCTCGGAGATGTGTATAAGAGACAGTCAATAGGGACGTCTCACTGGC
OS076	Genomic region ADE2 Q185* fwd	TCGTCGGCAGCGTCAGATGTGTATAAGAGACAGCGAGGACTTTGGCATACGATGG
OS077	Genomic region ADE2 Q185* rev	GTCTCGTGGGCTCGGAGATGTGTATAAGAGACAGCGCCTTAAGTTGAACGGAGTCC
OS242	Genomic region RAS2 S46L fwd	GTACTTGCCGCCTTCGTCTCTA
OS243	Genomic region RAS2 S46L rev	TGGTGGTGGTGGTGTTGGTAAA
OS244	Genomic region RAS2 Q272* fwd	TCTTGGAGGCTTCACTGGTGTT
OS245	Genomic region RAS2 Q272* rev	GTCGTGAATGCCAGGAATGCAA
OS232	Genomic region IRA2 W342* fwd	CAAGTGCCCGTAACACAGACAC
OS233	Genomic region IRA2 W342* rev	CGAAGGGGAAGATGAGCCTTGA
OS252	Genomic region SSY5 A637T fwd	GCAACATACCAACAAGCCCCAA
OS253	Genomic region SSY5 A637T rev	GGGCGAGAGAGCAATCGTAGAT
OS238	Genomic region POP1 H642Y fwd	TCGACAACGACATAGCCTTGGT
OS239	Genomic region POP1 H642Y rev	GTGTTACCATGGTTCTGGCTGC
OS250	Genomic region SIT4 Q184* fwd	CTGACGCTGGCCGCTATAATTG
OS251	Genomic region SIT4 Q184* rev	TCGACCTTCATTACACTCGCGA
