# Supplementary material for: Genome-wide base editor screen identifies regulators of protein abundance in yeast
Source: eLife. 2022 Nov 3;11:e79525. doi: 10.7554/eLife.79525 (PMC9633064; doi:10.7554/eLife.79525)
Supplement: Supplementary file 5. — The table lists candidate causal genes for previously described eQTL (Albert et al., 2018) and pQTL (Albert et al., 2014) hotspots identified in segregants of a cross between the S. cerevisiae strains BY S288C and RM11-1a. The candidate genes each affect at least three of our eleven proteins and contain at least one variant between BY and RM with a predicted medium or strong effect (i.e., missense mutation, indel, or premature stop codon). Note that the pQTLs were mapped for 160 proteins, five of which overlap with the eleven proteins studied here (Tdh1, Tdh3, Rpl9A, Ssa1, Yhb1); the eQTLs were mapped for transcripts of thousands of genes, including the genes encoding the eleven proteins studied here. [file elife-79525-supp5.xlsx]

## Sheet: Sheet1
Type	Hotspot ID	Chromosome	Hotspot peak	Hotspot start	Hotspot end	Known causal gene	Candidate genes (this study)
pQTL	2	chrII	NA	89002	227097		PRE7; RIB1; PET9
pQTL	3	chrII	NA	369902	415106		SEC18; UBC4
pQTL	7	chrVII	NA	92196	186694		ROK1; SUA5
pQTL	10	chrVIII	NA	413697	452100		PRP8; DBP8
pQTL	11	chrX	NA	107906	178103		SSY5
pQTL	14	chrXII	NA	125601	297999		DRS1; LMO1; PPR1
pQTL	18	chrXIV	NA	200799	293198		JJJ1; POP1; RAP1; YNL198C; CHS1
pQTL	19	chrXIV	NA	415298	530699	MKT1	DBP2; ARP5
pQTL	20	chrV	NA	106200	203100	IRA2	WRS1; ADH1; IRA2; THP1
eQTL	3	chrI	146738	138499	167326		SEN34
eQTL	5	chrII	13061	13061	18004		PKC1
eQTL	15	chrIII	262264	255891	264282		SRB8
eQTL	34	chrVI	156375	132559	161152		SPB4
eQTL	35	chrVI	229348	227693	240289		SAP155
eQTL	38	chrVII	194505	174975	205155		ROK1; SUA5; PMR1
eQTL	40	chrVII	397449	397449	398572	OLE1	OLE1
eQTL	43	chrVII	851062	850923	876915		TYS1
eQTL	55	chrX	187765	181214	191872		SPT10; GCD14
eQTL	57	chrX	429703	416411	455247		CTK2; CYR1; SUI2
eQTL	62	chrXI	102908	102671	109811		FAS1; PRS1
eQTL	71	chrXII	856042	845725	873750		ADE13; SSQ1
eQTL	81	chrXIV	18838	18046	24221		EGT2
eQTL	86	chrXV	50257	41495	62744		RIB4; RTC1
eQTL	88	chrXV	172956	168708	181326	IRA2	IRA2
eQTL	98	chrXVI	207364	207364	209279		PPQ1
